# Supplementary material
Source: publisher figshare collection journal article supplement (https://karger.figshare.com/ndownloader/files/8707576)
Supplement: Supplementary file 1 [file 8707576]

***Online Appendix for the following article: Use of on-line conductivity monitoring to study sodium mass balance in chronic hemodialysis patients: prospects for treatment individualisation***

Derivation of ionic mass balance (IMB) is derived by the Diascan<sup>®</sup> module using the following formula:

$$D = Qd \times (1 - [dC_{out2} - dC_{out1}] / [dC_{in2} - dC_{in1}])$$

Where  $D$  is ionic dialysance in ml/min.  $Qd$  is inlet dialysate flow (ml/min).  $dC$  is dialysate conductivity (mS/cm) at both the inlet,  $dC_{in}$  and outlet  $dC_{out}$  measured at two time points 1 and 2 before and during the transient increase.

Plasma water conductivity is derived from the calculated dialysance.

$$pC = dC_{in} - Qd / D (dC_{in} - dC_{out})$$

Where  $pC$  = plasma conductivity in millisiemens/centimetre (mS/cm). Effective plasma sodium conductivity derived by Diascan<sup>®</sup> has previously been shown to be significantly correlated to direct sodium conductivity measurement by conductivity meter ( $r=0.96$ ;  $p<0.05$ ) [21]<sup>19</sup>.

Ionic mass balance (IMB) is finally derived using the formula:

$$IMB = (Qd_{in} \times dC_{in} - Qd_{out} \times dC_{out}) \times 10 \times t$$

Where  $t$  = time (minutes) and  $Qd_{in}$  and  $Qd_{out}$  = dialysate inlet and outlet flow in ml/min respectively. IMB is predominately determined by sodium mass balance [37]. This has been shown to be significantly correlated to direct measurement of sodium in dialysate waste by ion-selective electrode ( $r=0.94$ ;  $p<0.05$ ) [21]. Positive values for IMB indicate net sodium removal from the patient. Plasma conductivity is measured by the Diascan<sup>®</sup> module to an accuracy of  $\pm 0.05$  mS/cm (Hospal supplied technical data).

The convective contribution was calculated using the mean of the initial and final plasma conductivity values derived by the monitor using a relationship derived from previous kinetic modelling using the same Diascan module [38]

$$[Na^+] = (pC \times 10.4) - 9.57$$

where  $[Na^+]$  is an estimate of plasma sodium. This  $Na^+$  value was multiplied by the ultrafiltration volume to derive an estimate of convective loss, and diffusive loss was estimated by subtracting this value from the total IMB as follows:

$$\text{IMB}_{\text{diff}} = \text{IMB} - [((pC_1 + pC_2 / 2) \times (10.4 - 9.57)) \times \text{UF volume}]$$

where  $pC_1$  and  $pC_2$  denote the values for plasma conductivity at the start and end of each treatment session. This equation assumes a linear reduction in plasma conductivity. To check the validity of this assumption we randomly selected 5 of the 24 patients and additionally recorded the values at 30 minute intervals in 6 treatment sessions. Validation of our estimate for  $\text{IMB}_{\text{diff}}$  derivation for 5 randomly selected patients was shown with an approximately linear fall ( $r^2=0.89$ ) seen in figure 5.

Figure 5.

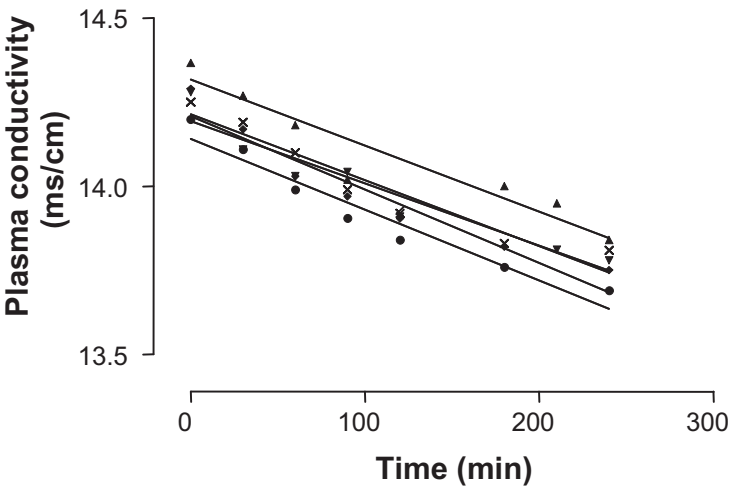

**Online supplementary figure 5.** Fall in plasma conductivity over a dialysis treatment session in 5 randomly selected patients ( $r^2 = 0.84\text{--}0.93$ ).  $p < 0.0001$ .
